# Supplementary material for: Utility of Investigations, History, and Physical Examination in “Medical Clearance” of Psychiatric Patients: A Meta-Analysis
Source: Atypon-hosted journal article supplement (doi:10.1176/appi.ps.202000858), 2022-06-23
Supplement: appi.ps.202000858.ds001.pdf [file appi.ps.202000858.ds001.pdf]

**PRISMA Flowchart of study selection process**

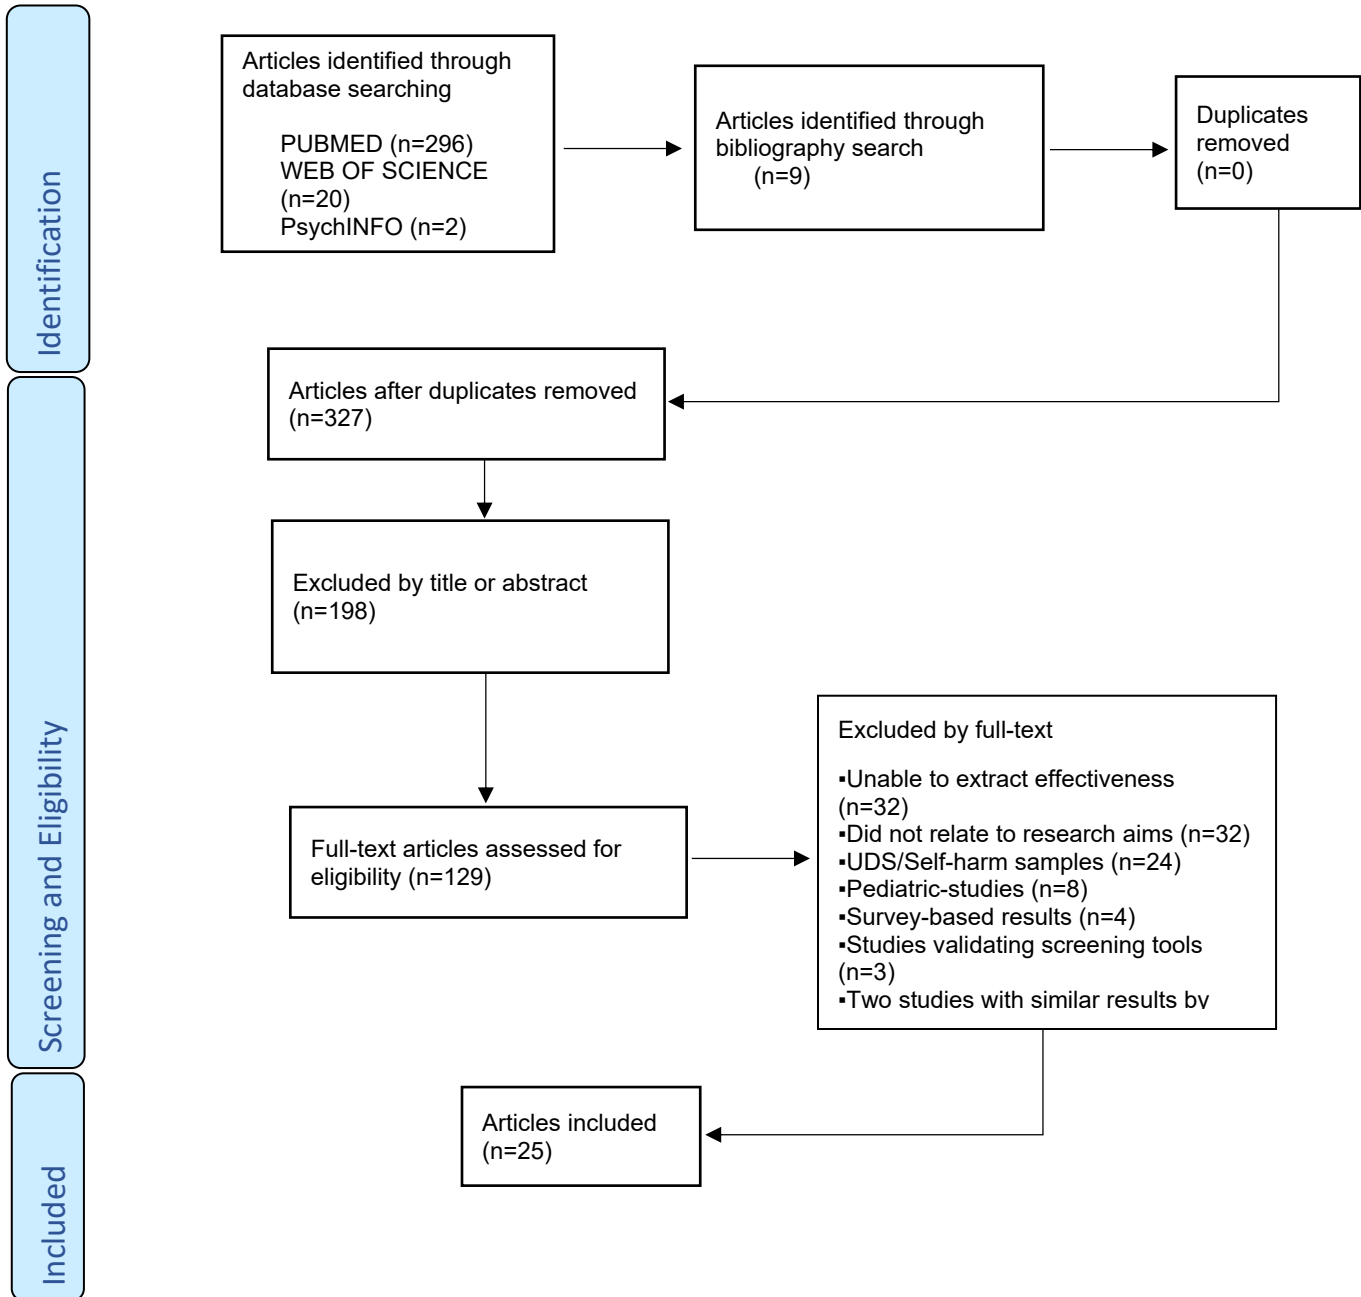

**Quality appraisal of studies - Appraisal tool for Cross-Sectional Studies (AXIS)<sup>1</sup>**

| <b>Authors</b>                  | <b>1</b> | <b>2</b> | <b>3</b> | <b>4</b> | <b>5</b> | <b>6</b> | <b>7</b> | <b>8</b> | <b>9</b> | <b>10</b> | <b>11</b> | <b>12</b> | <b>13</b> | <b>14</b> | <b>15</b> | <b>16</b> | <b>17</b> | <b>18</b> | <b>19</b> | <b>20</b> |
|---------------------------------|----------|----------|----------|----------|----------|----------|----------|----------|----------|-----------|-----------|-----------|-----------|-----------|-----------|-----------|-----------|-----------|-----------|-----------|
| Amin & Wang, 2009 (27)          | Y        | Y        | N        | Y        | Y        | Y        | Y        | Y        | Y        | Y         | Y         | Y         | Y         | N         | Y         | Y         | Y         | Y         | N         | Y         |
| Chandler & Gerndt, 1988 (28)    | Y        | Y        | N        | Y        | Y        | Y        | ?        | Y        | Y        | N         | Y         | Y         | ?         | ?         | Y         | Y         | Y         | Y         | N         | Y         |
| Colgan & Philbot, 1985 (29)     | Y        | Y        | N        | Y        | Y        | Y        | Y        | N        | Y        | N         | Y         | Y         | ?         | ?         | Y         | Y         | Y         | Y         | N         | N         |
| Crede et al., 2011 (30)         | Y        | Y        | N        | Y        | Y        | Y        | Y        | Y        | N        | Y         | Y         | N         | N         | Y         | Y         | Y         | Y         | Y         | N         | Y         |
| Dolan & Mushlin, 1985 (31)      | Y        | Y        | N        | Y        | Y        | Y        | Y        | Y        | Y        | Y         | Y         | Y         | N         | N         | ?         | Y         | Y         | Y         | N         | N         |
| Dubin et al., 1983 (32)         | Y        | Y        | N        | Y        | Y        | Y        | N        | Y        | Y        | N         | Y         | N         | ?         | N         | Y         | Y         | Y         | N         | N         | N         |
| Eastwood et al., 1970 (33)      | Y        | Y        | N        | Y        | Y        | Y        | N        | Y        | Y        | N         | Y         | N         | N         | ?         | Y         | Y         | Y         | N         | N         | N         |
| Ferguson & Dudleston, 1986 (34) | Y        | Y        | N        | Y        | Y        | N        | N        | Y        | Y        | N         | Y         | Y         | ?         | ?         | ?         | Y         | Y         | N         | N         | N         |
| Hall et al., 1980 (35)          | Y        | Y        | N        | Y        | N        | Y        | ?        | Y        | ?        | N         | N         | Y         | ?         | ?         | Y         | Y         | Y         | Y         | N         | N         |
| Hatta et al., 1998 (36)         | Y        | Y        | N        | Y        | Y        | Y        | ?        | Y        | Y        | Y         | Y         | Y         | ?         | N         | Y         | Y         | Y         | N         | N         | N         |
| Henneman et al., 1994 (37)      | Y        | Y        | N        | Y        | N        | Y        | N        | Y        | N        | Y         | Y         | N         | ?         | N         | Y         | Y         | Y         | Y         | N         | Y         |
| Janiak & Atteberry, 2012 (38)   | Y        | Y        | N        | N        | Y        | Y        | N        | Y        | Y        | N         | Y         | Y         | N         | N         | Y         | N         | Y         | Y         | N         | Y         |
| Johnson, 1968 (39)              | Y        | Y        | N        | Y        | Y        | Y        | ?        | Y        | N        | N         | N         | N         | ?         | ?         | ?         | Y         | ?         | N         | N         | N         |
| Kagel et al., 2017 (40)         | Y        | Y        | Y        | Y        | Y        | Y        | ?        | Y        | Y        | Y         | Y         | Y         | N         | ?         | Y         | Y         | Y         | Y         | N         | Y         |
| Kolman, 1985 (41)               | Y        | Y        | N        | Y        | Y        | Y        | Y        | Y        | Y        | N         | Y         | Y         | N         | N         | Y         | Y         | Y         | N         | N         | N         |
| Korn et al., 2000 (42)          | Y        | N        | N        | Y        | Y        | Y        | Y        | Y        | Y        | N         | Y         | Y         | N         | ?         | Y         | Y         | Y         | Y         | N         | N         |
| Olshaker et al., 1997 (43)      | Y        | Y        | N        | Y        | Y        | Y        | Y        | Y        | Y        | N         | Y         | N         | N         | N         | Y         | N         | Y         | Y         | N         | Y         |
| Parmar et al., 2012 (44)        | Y        | Y        | Y        | Y        | ?        | Y        | Y        | Y        | Y        | N         | Y         | N         | N         | N         | Y         | Y         | Y         | Y         | N         | Y         |
| Saloojee, 2009 (45)             | Y        | Y        | N        | Y        | Y        | Y        | N        | Y        | Y        | Y         | Y         | Y         | Y         | Y         | Y         | Y         | Y         | Y         | N         | Y         |
| Schauer & Goolsby, 2015 (46)    | Y        | Y        | N        | Y        | Y        | Y        | N        | Y        | Y        | N         | Y         | Y         | Y         | N         | Y         | Y         | Y         | Y         | N         | Y         |
| Sheline & Kehr, 1990 (47)       | Y        | Y        | N        | Y        | Y        | Y        | ?        | Y        | ?        | N         | N         | Y         | ?         | ?         | Y         | Y         | Y         | Y         | N         | N         |
| Thomas, 1979 (48)               | Y        | Y        | N        | Y        | Y        | Y        | Y        | Y        | Y        | N         | Y         | Y         | N         | N         | Y         | Y         | Y         | Y         | N         | N         |
| Tobin et al., 2020 (49)         | Y        | Y        | N        | Y        | Y        | N        | Y        | Y        | Y        | N         | N         | Y         | N         | Y         | Y         | Y         | Y         | Y         | N         | Y         |
| White & Barraclough, 1989 (50)  | Y        | Y        | N        | Y        | Y        | Y        | N        | Y        | Y        | Y         | Y         | Y         | ?         | ?         | Y         | Y         | Y         | Y         | N         | N         |
| Willett & King, 1977 (51)       | Y        | Y        | N        | Y        | Y        | Y        | ?        | Y        | Y        | N         | Y         | Y         | ?         | ?         | Y         | Y         | Y         | N         | N         | N         |

Y=Yes; N=No; ?=Unable to determine

<sup>1</sup>Downes et al. (18)

*Introduction*

1 Were the aims/objectives of the study clear?

*Methods*

2 Was the study design appropriate for the stated aim(s)?

3 Was the sample size justified?

4 Was the target/reference population clearly defined? (Is it clear who the research was about?)

5 Was the sample frame taken from an appropriate population base so that it closely represented the target/reference population under investigation?

6 Was the selection process likely to select subjects/participants that were representative of the target/reference population under investigation?

7 Were measures undertaken to address and categorize non-responders?

8 Were the risk factor and outcome variables measured appropriate to the aims of the study?

9 Were the risk factor and outcome variables measured correctly using instruments/measurements that had been trialed, piloted or published previously?

10 Is it clear what was used to determine statistical significance and/or precision estimates? (eg, p values, CIs)

11 Were the methods (including statistical methods) sufficiently described to enable them to be repeated?

*Results*

12 Were the basic data adequately described?

13 Does the response rate raise concerns about non-response bias?

14 If appropriate, was information about non-responders described?

15 Were the results internally consistent?

16 Were the results for the analyses described in the methods, presented?

*Discussion*

17 Were the authors' discussions and conclusions justified by the results?

18 Were the limitations of the study discussed?

*Other*

19 Were there any funding sources or conflicts of interest that may affect the authors' interpretation of the results?

20 Was ethical approval or consent of participants attained?
